# Supplementary material
Source: PubMed Central journal article supplement (PMC4999340)
Supplement: NIHMS809764-supplement-supplementray__pdf.pdf [file NIHMS809764-supplement-supplementray__pdf.pdf]

**Crystal Alignment.** The monoclinic crystals of [Fe(TpFPP)(NO)(1-MeIm)] have one molecule per asymmetric unit, and the unit cell contains two pairs of inversion related molecules. The unit cell dimensions were:  $a = 14.1135(4)$ ,  $b = 18.7149(6)$ ,  $c = 14.8501(4)$ ,  $\alpha = 90$ ,  $\beta = 97.825(1)$ ,  $\gamma = 90$  and the space group was  $P2_1/n$ . The crystal was mounted on to a goniometer head using the copper wire and glass rod setup described. The best fit to the porphyrin planes, (0 1 0), and to the O<sub>NO</sub>-N<sub>NO</sub>-Fe-N<sub>Im</sub> plane, (-8 1 20) were determined using *Mercury*. After alignment to have (0 1 0) parallel to the laboratory floor the APEX II software was used to determine that a 59° clockwise rotation would put the O<sub>NO</sub>-N<sub>NO</sub>-Fe-N<sub>Im</sub> plane normal to the beam, and therefore 149° clockwise rotation would put this plane perpendicular to the beam. Red tape was used to mark the O<sub>NO</sub>-N<sub>NO</sub>-Fe-N<sub>Im</sub> plane and black tape for its normal plane. General in-plane and out-of-plane measurements for the triclinic form of [Fe(TpFPP)(NO)(1-MeIm)] and [Fe(TpOCH<sub>3</sub>PP)(NO)(1-MeIm)] were carried out as in Silvernail, N. J.; Barabanschikov, A.; Pavlik, J. W.; Noll, B. C.; Zhao, J.; Alp, E. E.; Sturhahn, W.; Sage, J. T.; Scheidt, W. R. *J. Am. Chem. Soc.* **2007**, *129*, 2200.

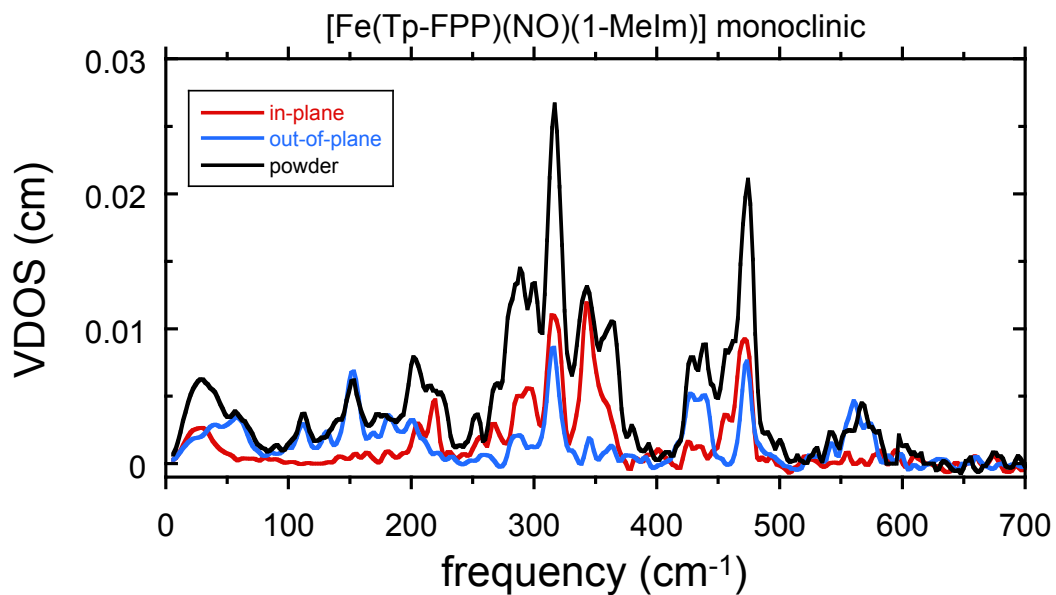

**Figure S1.** Comparison of the density of states from a powder sample of monoclinic [Fe(TpFPP)(1-MeIm)(NO)] and two oriented crystal components: out-of-plane (blue line), general in-plane (“gen-ip,” red line), and powder (black).

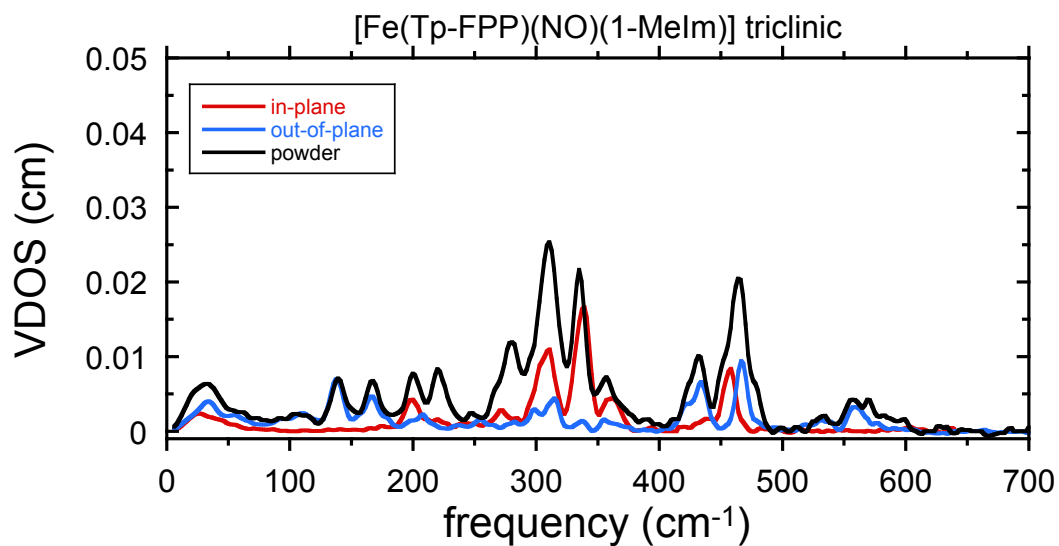

**Figure S2.** Comparison of the density of states from a powder sample of triclinic [Fe(TpFPP)(1-MeIm)(NO)] and two oriented crystal components: out-of-plane (blue line), general in-plane (“gen-ip,” red line), and powder (black).

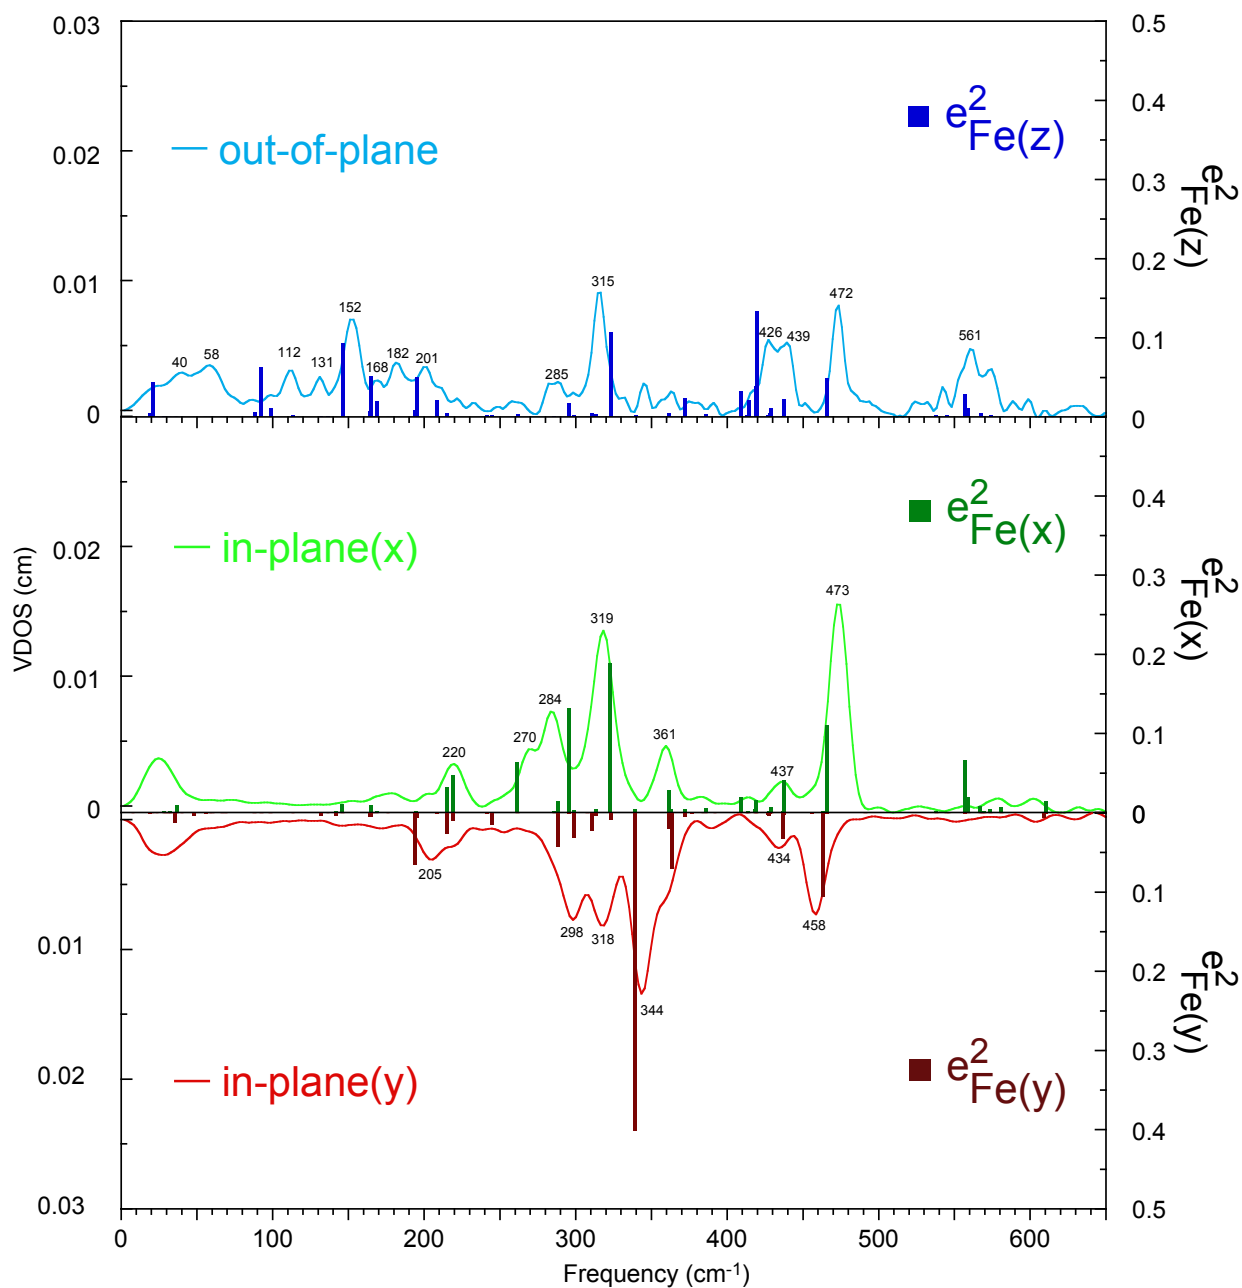

**Figure S3.** Comparison of the the experimental and predicted vibrational spectra for *mono*-[Fe(TpFPP)(1-MeIm)(NO)] based on a B3LYP prediction.

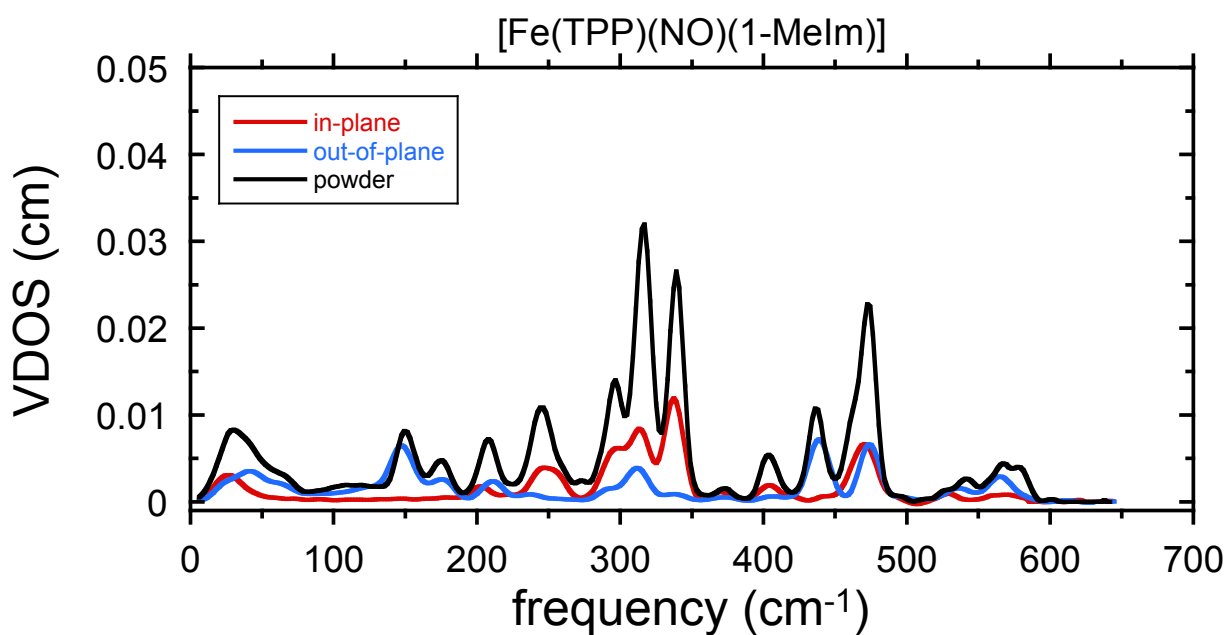

**Figure S4.** Comparison of the density of states from a powder sample of [Fe(TPP)(1-MeIm)(NO)] with two oriented crystal components: out-of-plane (blue line), and general in-plane (“gen-ip,” red line) and powder (black).

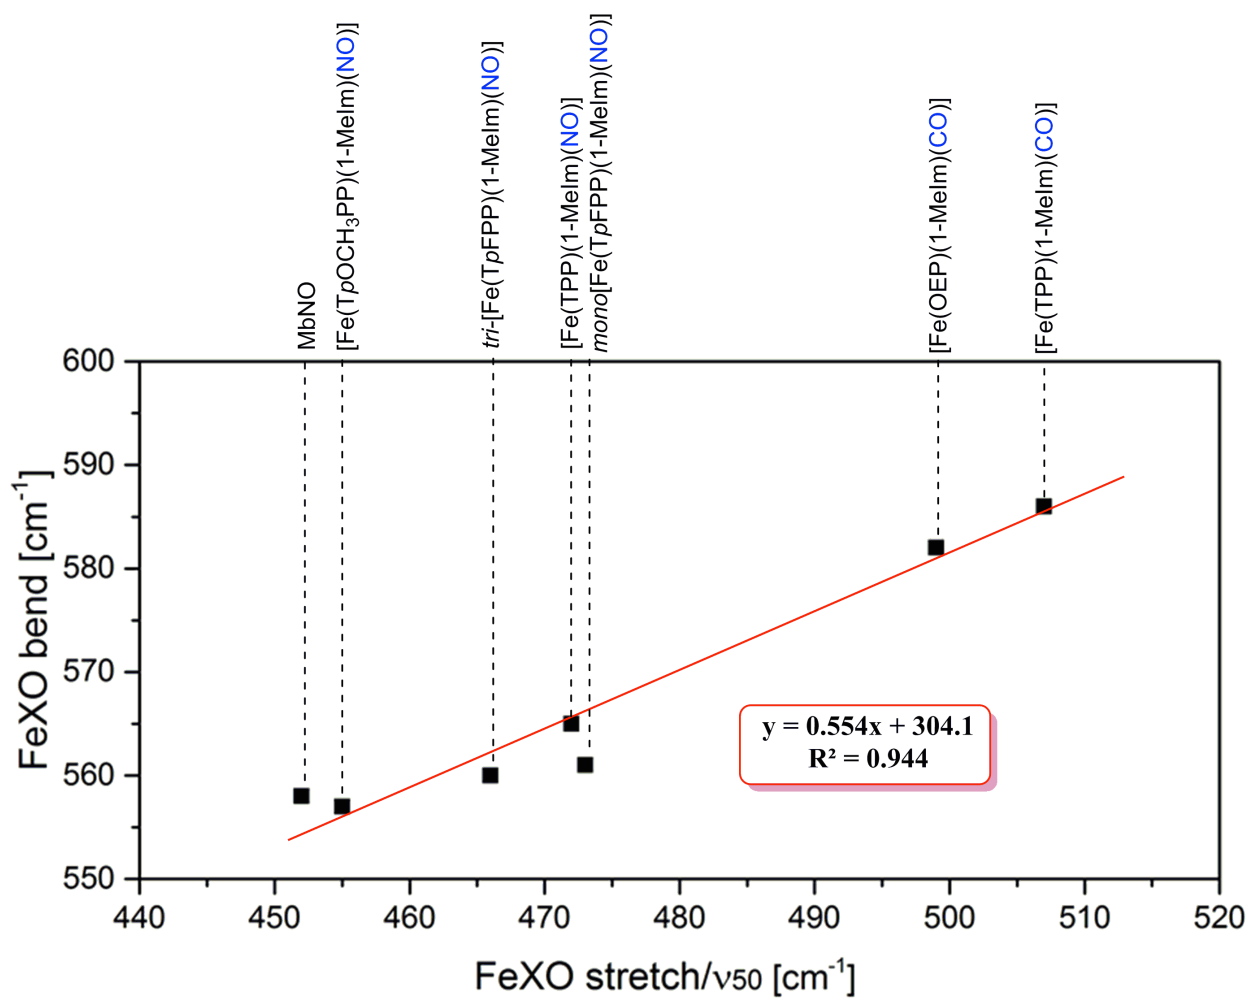

**Figure S5.** Figure showing the correlation between the NRVS assigned bend and the assigned stretch for all FeXO species with iron in the Fe(II) state.

**Table S1.** COMPONENT AND TOTAL MODE COMPOSITION FACTORS OF [Fe(TpFPP)(1-MeIm)(NO)] FOR MODES WITH  $e_{Fe}^2 > 0.005$ . TOTAL MODE COMPOSITION FACTORS REPRESENT THE IRON FRACTION OF KINETIC ENERGY WITHIN EACH MODE. PREDICTIONS MADE USING M06L/TZVP.

| frequency | e2x      | e2y      | e2z      | e2xyz    |
|-----------|----------|----------|----------|----------|
| 20.9      | 0.001540 | 0.000018 | 0.030490 | 0.032040 |
| 24.5      | 0.001810 | 0.000038 | 0.021560 | 0.023410 |
| 39.1      | 0.009140 | 0.000094 | 0.000366 | 0.009600 |
| 39.9      | 0.000009 | 0.009330 | 0.000016 | 0.009360 |
| 46.7      | 0.005670 | 0.000000 | 0.000675 | 0.006350 |
| 87.6      | 0.000001 | 0.000064 | 0.044570 | 0.044630 |
| 90.4      | 0.000026 | 0.000409 | 0.010990 | 0.011430 |
| 129.4     | 0.003490 | 0.000014 | 0.199220 | 0.202730 |
| 143.1     | 0.003540 | 0.000055 | 0.029730 | 0.033330 |
| 145.9     | 0.003250 | 0.000358 | 0.024150 | 0.027760 |
| 146.8     | 0.000456 | 0.000000 | 0.007210 | 0.007660 |
| 164.2     | 0.000366 | 0.024930 | 0.001790 | 0.027090 |
| 172.2     | 0.000538 | 0.001430 | 0.003930 | 0.005900 |
| 181.8     | 0.001970 | 0.009080 | 0.000083 | 0.011130 |
| 200.1     | 0.004240 | 0.000032 | 0.023470 | 0.027750 |
| 213.2     | 0.000859 | 0.057940 | 0.002000 | 0.060800 |
| 216.6     | 0.000028 | 0.000099 | 0.021460 | 0.021590 |
| 220.7     | 0.104880 | 0.000183 | 0.001870 | 0.106940 |
| 236.8     | 0.003230 | 0.011960 | 0.007740 | 0.022930 |
| 239.1     | 0.004430 | 0.000283 | 0.002190 | 0.006900 |
| 259.4     | 0.040590 | 0.000681 | 0.002020 | 0.043300 |
| 278.2     | 0.066460 | 0.021710 | 0.003200 | 0.091380 |
| 281.2     | 0.031680 | 0.041490 | 0.042140 | 0.115300 |
| 290.0     | 0.003850 | 0.009630 | 0.007150 | 0.020630 |
| 292.6     | 0.005380 | 0.049550 | 0.001690 | 0.056620 |
| 306.1     | 0.050870 | 0.035690 | 0.028920 | 0.115480 |
| 309.3     | 0.001100 | 0.008700 | 0.001080 | 0.010880 |
| 312.4     | 0.054360 | 0.007580 | 0.017340 | 0.079280 |
| 314.7     | 0.159770 | 0.011430 | 0.047900 | 0.219100 |
| 327.2     | 0.002020 | 0.409480 | 0.002400 | 0.413910 |
| 361.6     | 0.009160 | 0.035030 | 0.000569 | 0.044750 |
| 363.1     | 0.001730 | 0.004460 | 0.003270 | 0.009460 |
| 365.2     | 0.024030 | 0.023130 | 0.006580 | 0.053740 |
| 385.7     | 0.006470 | 0.000007 | 0.003080 | 0.009550 |
| 427.3     | 0.000159 | 0.001440 | 0.013310 | 0.014910 |
| 428.4     | 0.000196 | 0.006010 | 0.005020 | 0.011220 |
| 429.1     | 0.000124 | 0.005820 | 0.002480 | 0.008420 |
| 439.1     | 0.005460 | 0.000894 | 0.052080 | 0.058440 |
| 446.0     | 0.002100 | 0.014170 | 0.006670 | 0.022930 |
| 448.4     | 0.011470 | 0.001260 | 0.015430 | 0.028160 |
| 460.4     | 0.000381 | 0.091610 | 0.000063 | 0.092050 |
| 480.8     | 0.233920 | 0.000118 | 0.102270 | 0.336310 |
| 487.3     | 0.010130 | 0.000152 | 0.004850 | 0.015130 |
| 573.1     | 0.001210 | 0.000000 | 0.012210 | 0.013430 |
| 576.7     | 0.000571 | 0.000000 | 0.009370 | 0.009940 |
| 598.8     | 0.024660 | 0.000020 | 0.082160 | 0.106840 |
| 611.6     | 0.000636 | 0.004900 | 0.000060 | 0.005590 |
| 612.5     | 0.014430 | 0.000375 | 0.003270 | 0.018070 |

Table S2 [Fe(TpOMePP)(NO)(1-Melm)] with  $e^2_{Fe} \geq 0.005$  (e2x: parallel to Fe-N-O plane, e2y: perpendicular to Fe-N-O plane ) by M06L functional

| frequency | e2x      | e2y      | e2z      | e2xyz    |
|-----------|----------|----------|----------|----------|
| 26.2      | 0.001930 | 0.000579 | 0.027130 | 0.029640 |
| 27.0      | 0.000008 | 0.003120 | 0.004400 | 0.007530 |
| 34.1      | 0.004400 | 0.006690 | 0.000033 | 0.011130 |
| 36.9      | 0.003890 | 0.001140 | 0.000493 | 0.005520 |
| 39.6      | 0.001950 | 0.001030 | 0.018800 | 0.021780 |
| 39.8      | 0.000351 | 0.001890 | 0.006510 | 0.008750 |
| 71.4      | 0.000639 | 0.000365 | 0.004360 | 0.005370 |
| 81.6      | 0.002310 | 0.001970 | 0.000973 | 0.005250 |
| 86.8      | 0.000045 | 0.000334 | 0.027200 | 0.027580 |
| 92.7      | 0.000006 | 0.000033 | 0.007740 | 0.007780 |
| 95.2      | 0.000028 | 0.000622 | 0.030300 | 0.030950 |
| 105.2     | 0.000509 | 0.000005 | 0.007520 | 0.008030 |
| 109.2     | 0.001810 | 0.002210 | 0.002330 | 0.006350 |
| 118.2     | 0.000136 | 0.000212 | 0.012020 | 0.012370 |
| 118.7     | 0.000081 | 0.000078 | 0.006700 | 0.006860 |
| 127.0     | 0.000318 | 0.000707 | 0.156700 | 0.157720 |
| 145.8     | 0.004760 | 0.000000 | 0.044110 | 0.048870 |
| 146.4     | 0.007100 | 0.000462 | 0.035130 | 0.042700 |
| 168.1     | 0.000317 | 0.031560 | 0.000215 | 0.032090 |
| 169.1     | 0.000341 | 0.006360 | 0.000178 | 0.006880 |
| 181.3     | 0.002360 | 0.003360 | 0.002010 | 0.007740 |
| 183.3     | 0.002230 | 0.000320 | 0.007820 | 0.010370 |
| 209.6     | 0.055360 | 0.010330 | 0.000019 | 0.065710 |
| 211.3     | 0.038380 | 0.007810 | 0.001200 | 0.047380 |
| 219.7     | 0.000160 | 0.032680 | 0.006290 | 0.039130 |
| 234.0     | 0.000364 | 0.002810 | 0.002980 | 0.006150 |
| 245.6     | 0.010970 | 0.004710 | 0.000149 | 0.015830 |
| 251.8     | 0.024620 | 0.000529 | 0.000003 | 0.025160 |
| 255.4     | 0.002700 | 0.003780 | 0.002050 | 0.008530 |
| 271.4     | 0.040310 | 0.008720 | 0.022070 | 0.071100 |
| 278.7     | 0.018770 | 0.000572 | 0.056800 | 0.076150 |
| 283.5     | 0.037710 | 0.015110 | 0.004790 | 0.057610 |
| 285.3     | 0.004460 | 0.032530 | 0.000336 | 0.037320 |
| 289.6     | 0.004780 | 0.016390 | 0.000783 | 0.021950 |
| 290.6     | 0.001880 | 0.030020 | 0.000013 | 0.031920 |
| 298.2     | 0.005420 | 0.001250 | 0.003060 | 0.009730 |
| 307.4     | 0.178180 | 0.028210 | 0.013210 | 0.219600 |
| 307.8     | 0.039670 | 0.035700 | 0.014590 | 0.089970 |
| 318.8     | 0.038930 | 0.062120 | 0.038450 | 0.139500 |
| 327.5     | 0.012220 | 0.379090 | 0.019380 | 0.410690 |
| 341.6     | 0.003870 | 0.001110 | 0.000962 | 0.005940 |
| 352.2     | 0.009590 | 0.013440 | 0.004220 | 0.027250 |
| 365.7     | 0.018140 | 0.013700 | 0.002470 | 0.034310 |
| 370.2     | 0.002030 | 0.002680 | 0.003600 | 0.008310 |
| 375.8     | 0.001020 | 0.028660 | 0.000579 | 0.030250 |
| 384.7     | 0.007750 | 0.001010 | 0.004410 | 0.013170 |
| 427.0     | 0.000091 | 0.000005 | 0.016510 | 0.016610 |
| 431.9     | 0.000136 | 0.000302 | 0.009710 | 0.010150 |
| 432.9     | 0.000882 | 0.007920 | 0.002990 | 0.011790 |
| 435.4     | 0.000810 | 0.001510 | 0.004990 | 0.007310 |
| 437.1     | 0.005890 | 0.000659 | 0.023910 | 0.030460 |
| 444.7     | 0.000194 | 0.022930 | 0.000019 | 0.023140 |
| 450.1     | 0.005230 | 0.001680 | 0.018730 | 0.025650 |
| 458.7     | 0.000000 | 0.056010 | 0.000423 | 0.056430 |
| 472.7     | 0.228260 | 0.000243 | 0.085290 | 0.313800 |
| 507.2     | 0.000220 | 0.019790 | 0.001520 | 0.021530 |
| 511.1     | 0.047830 | 0.000052 | 0.005290 | 0.053170 |
| 580.6     | 0.000205 | 0.000258 | 0.021670 | 0.022130 |
| 593.6     | 0.001790 | 0.000141 | 0.013690 | 0.015620 |
| 600.3     | 0.017030 | 0.000645 | 0.084580 | 0.102250 |
| 621.0     | 0.002890 | 0.002470 | 0.000254 | 0.005610 |
| 621.4     | 0.004200 | 0.001320 | 0.000639 | 0.006160 |
